# Supplementary material for: Smartphone-imaged microfluidic biochip for measuring CD64 expression from whole blood
Source: Royal Society of Chemistry journal article supplement (doi:10.1039/c9an00532c), 2019-01-01

## Smartphone-Imaged Microfluidic Biochip for Measuring CD64 Expression from Whole Blood

Tanmay Ghonge<sup>1,2,3</sup>, Hatice Ceylan Koydemir<sup>6</sup>, Enrique Valera<sup>1,2,3</sup>, Jacob Berger<sup>1,2,3</sup>, Carlos Garcia<sup>1,2,3</sup>, Noshin Nawar<sup>1,2,3</sup>, Justin Tiao<sup>1,2,3</sup>, Gregory L. Damhorst<sup>5</sup>, Anurup Ganguli<sup>1,2</sup>, Umer Hassan<sup>9</sup>, Aydogan Ozcan<sup>6,7,8,\*</sup>, Rashid Bashir<sup>1,2,3,4,\*</sup>

<sup>1</sup> Department of Bioengineering, University of Illinois at Urbana-Champaign, Urbana, IL 61801 USA.

<sup>2</sup> Micro and Nanotechnology Lab, University of Illinois at Urbana-Champaign, Urbana, IL 61801 USA.

<sup>3</sup> Biomedical Research Center, Carle Foundation Hospital, Urbana, IL, 61801 USA.

<sup>4</sup> Carle Illinois College of Medicine, Urbana, IL, 61801 USA.

<sup>5</sup> Emory University School of Medicine, Emory University, Atlanta, GA, 30322 USA.

<sup>6</sup> Electrical and Computer Engineering, University of California, Los Angeles, CA, 90095 USA.

<sup>7</sup> Bioengineering, University of California, Los Angeles, CA, 90095 USA.

<sup>8</sup> California NanoSystems Institute, University of California, Los Angeles, CA, 90095 USA.

<sup>9</sup> Department of Electrical and Computer Engineering, Rutgers University, Piscataway, NJ, 08854, USA.

\*Corresponding Authors:

Rashid Bashir, email: [rbashir@illinois.edu](mailto:rbashir@illinois.edu);

Aydogan Ozcan, email: [ozcan@ucla.edu](mailto:ozcan@ucla.edu)

Contents:

S-1. Master mold fabrication protocol.

S-2. Biotin-beads conjugation protocol.

S-3. Sequence of operation for extracting cell-coordinates.

S-4. Relevant patient information.

S-5. Biochip measurement protocol.

### S-1. Master mold fabrication protocol

SU8-50 was spun at 2200 rpm (30 s.) on the Si wafer. After soft-baking the wafer at the recommended temperature and time, SU-8 was exposed with UV light ( $400 \text{ mJ cm}^{-2}$ ). Then, the wafer was bake. After baking (at the recommended temperature and time), unexposed SU-8 was washed away by developing the wafer in SU8 developer. The wafer was hard-baked ( $150 \text{ }^\circ\text{C}$ , 10 min.) on a hotplate. Finally, the surface of the mold was silanized by 3-mercaptopropyltrimethoxysilane.

### S-2. Biotin-beads conjugation protocol

COMPEL™ beads solution (25  $\mu\text{L}$ ) was incubated with 100 mM EDC and 50 mM NHS for 20 min. After the incubation, the beads were centrifuged, and the solution was aspirated. Then, a solution containing Amine-PEG2-Biotin (50  $\mu\text{L}$ ) was added and incubated for 2 h. at RT.

After the incubation, the beads were centrifuged, and the solution was aspirated. The beads were blocked with a glycine solution (100  $\mu\text{L}$ ,  $7500 \mu\text{g mL}^{-1}$ ). The beads were centrifuged and resuspended in PBS (storage solution, 100  $\mu\text{L}$ ).

### S-3. Sequence of operation for extracting cell-coordinates

In order to identify cells from the images acquired through the smartphone-based microscope, the following steps were taken; 1) the background was subtracted from raw, grayscale images; 2) the images were binarized by performing a thresholding operation, and 3) the cells in the binary image were identified by using a transform operation in the MATLAB library.

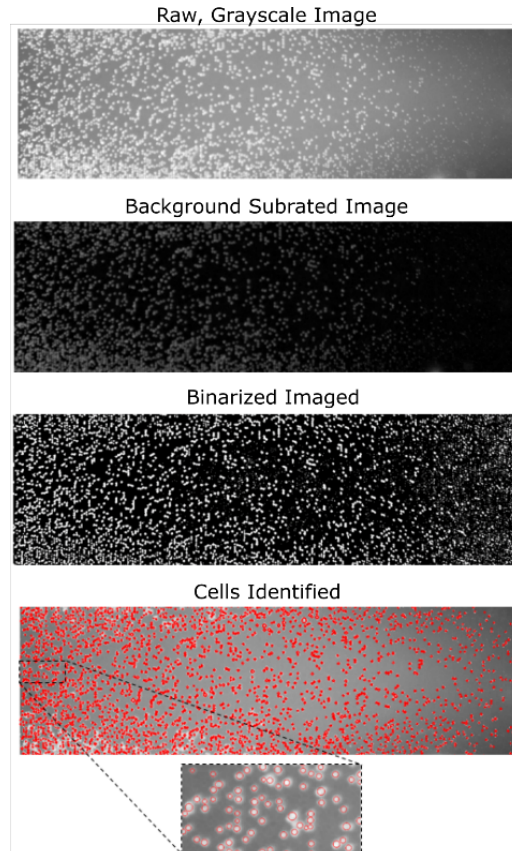

#### S-4. Relevant patient information

Table S-1 below summarizes relevant patient information provided by Carle Foundation Hospital

| Patient | Gender | Age (years) | nCD64 Range | Neutrophil Count Range ( $\mu\text{L}^{-1}$ ) | Blood Culture Test                                                         | Sepsis Diagnosis                    | Remark                                                  |
|---------|--------|-------------|-------------|-----------------------------------------------|----------------------------------------------------------------------------|-------------------------------------|---------------------------------------------------------|
| A       | Male   | 73          | 0.55 – 1.23 | 2547 – 4933                                   | Negative                                                                   | Sepsis; due to unspecified organism | NA                                                      |
| B       | Male   | >89         | 2.60 – 4.52 | 1149 – 2533                                   | Negative                                                                   | NA                                  | NA                                                      |
| C       | Male   | 84          | 5.42 – 5.45 | 3177 – 5238                                   | Negative                                                                   | NA                                  | Patient died 26.8 hours after admission to the hospital |
| D       | Male   | 70          | 0.36 – 1.36 | 2954 – 5116                                   | Positive; Enterococcus faecalis - (Group D)                                | Sepsis; due to Enterococcus         | NA                                                      |
| E       | Male   | 81          | 1.54 – 6.6  | 831– 1748                                     | Positive; Enterobacter Cloacae Complex & Coagulase negative Staphylococcus | Gram negative septicemia            | NA                                                      |
| F       | Male   | 64          | 2.96 – 4.09 | 1266 – 3360                                   | Negative                                                                   | Severe sepsis                       | NA                                                      |
| G       | Female | 77          | 0.41 – 0.84 | 444 – 2425                                    | Negative                                                                   | NA                                  | NA                                                      |
| H       | Female | 77          | 1.45        | 5470                                          | Negative                                                                   | Sepsis; due to unspecified organism | NA                                                      |

### S-5. Biochip measurement protocol

The measurement procedure included: 1) sample injection and cell immunocapture (1  $\mu\text{L}$ , 1 min); 2) wash step (1% BSA in PBS, 50  $\mu\text{L}$ , 5 min); 3) cells fixation (1-step fix/lyse solution, 50  $\mu\text{L}$ , 5 min, incubation time: 15 min); 4) cells staining (2  $\mu\text{M}$  SYTO™ 16, 50  $\mu\text{L}$ , 5 min, incubation time: 15 min); 5) imaging (30 s); and 6) counting analysis (30 s).

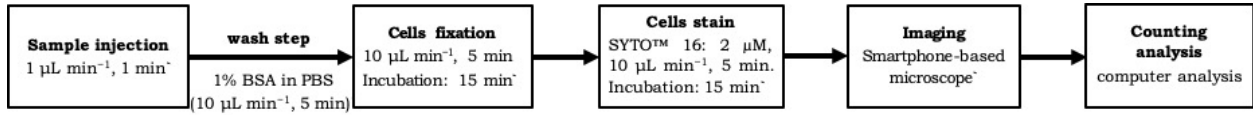

Supplement: c9an00532c1.pdf [file c9an00532c1.pdf]
